# Supplementary material for: Evidences for Piperine inhibiting cancer by targeting human G-quadruplex DNA sequences
Source: PubMed Central journal article supplement (PMC5171706; doi:10.1038/srep39239), 2016-12-20
Supplement: srep39239-s1.pdf [file srep39239-s1.pdf]

# Evidences for Piperine inhibiting cancer by targeting human G-quadruplex DNA sequences

Arpita Tawani<sup>1</sup>, Ayeman Amanullah<sup>2</sup>, Amit Mishra<sup>2</sup> and Amit Kumar<sup>1,\*</sup>

\* Corresponding author

Email: [amitk@iiti.ac.in](mailto:amitk@iiti.ac.in) (AK)

<sup>1</sup>*Center for Biosciences and Biomedical Engineering, Indian Institute of Technology Indore  
Khandwa Road, Simrol, Indore 453552, Madhya Pradesh, India*

<sup>2</sup>*Cellular and Molecular Neurobiology Unit, Indian Institute of Technology Jodhpur 342011,  
Rajasthan, India*

## Index

|                                                                                                                                                                               |        |
|-------------------------------------------------------------------------------------------------------------------------------------------------------------------------------|--------|
| <b>SI. Supplementary Tables</b>                                                                                                                                               | S3-S4  |
| <b>Table S1.</b> The binding constant ( $K_d$ ,(M)) values of Piperine with G- quadruplex DNA and CT-DNA.                                                                     | S3     |
| <b>Table S2.</b> The melting temperature values of G-quadruplex DNA in absence and presence of Piperine.                                                                      | S3     |
| <b>SII. Supplementary Figures</b>                                                                                                                                             | S4-S10 |
| <b>Figure S1.</b> Time resolved fluorescence decay profile of 40.0 $\mu$ M Piperine (Black) and its complex with CT-DNA at D/N ratio = 1.0 (Red) and D/N ratio = 2.0 (Green). | S4     |
| <b>Figure S2.</b> CD spectrum of Pu24T DNA and its complex with Piperin showing Induced CD signals                                                                            | S5     |
| <b>Figure S3.</b> One dimensional proton spectra for Piperine and Pu24T complex.                                                                                              | S6     |
| <b>Figure S4.</b> NOESY spectra for Piperine and Pu24T complex.                                                                                                               | S7     |
| <b>Figure S5.</b> Representation of docked structure of complex obtained from docking.                                                                                        | S8     |
| <b>Figure S6.</b> Representation of hydrogen bond formation.                                                                                                                  | S9     |
| <b>Figure S7.</b> PCR stop assay for Pu24T and Piperine.                                                                                                                      | S10    |
| <b>Figure S8.</b> Cytotoxic effect of Piperine various cancer cell lines.                                                                                                     | S11    |
| <b>Figure S9.</b> Full image of Gel mobility shift assay.                                                                                                                     | S12    |
| <b>Figure S10.</b> Full image of semi-quantitative RT-PCR.                                                                                                                    | S13    |

## SI. Supplementary Tables

**Table S1.** The binding constant ( $K_d$ ,(M)) values of Piperine with G-quadruplex DNA and CT-DNA.

| DNA     | Binding Constant       |                        |
|---------|------------------------|------------------------|
|         | $K_d1$ (M)             | $K_d2$ (M)             |
| Pu24T   | $2.50 \times 10^{-9}$  | $1.14 \times 10^{-6}$  |
| Tel22   | $8.75 \times 10^{-8}$  | $14.8 \times 10^{-6}$  |
| c-kit21 | $1.12 \times 10^{-8}$  | $12.73 \times 10^{-6}$ |
| CT-DNA  | $24.12 \times 10^{-6}$ | --                     |

**Table S2.** The melting temperature values of G-quadruplex DNA in absence and presence of Piperine.

| DNA     | Melting Temperature ( $^{\circ}$ C) |           |           |
|---------|-------------------------------------|-----------|-----------|
|         | D/N = 0.0                           | D/N = 1.0 | D/N = 2.0 |
| Pu24T   | 75.0                                | 78.0      | 79.0      |
| Tel22   | 60.0                                | 61.0      | 62.0      |
| c-kit21 | 66.6                                | 67.2      | 67.4      |

## SII. Supplementary Figures.

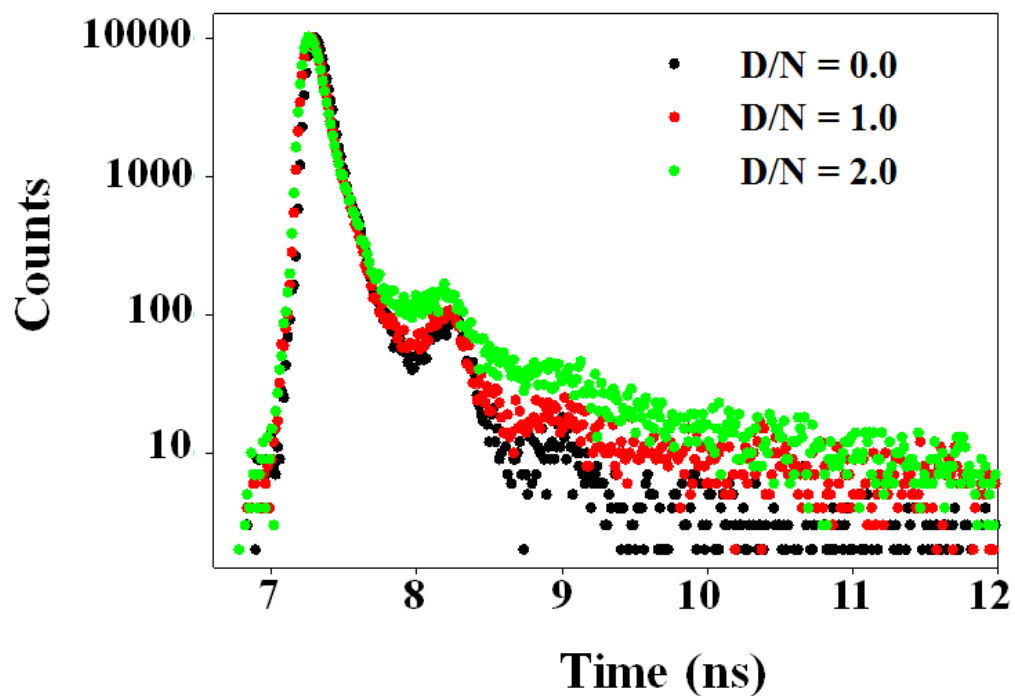

Figure S1. Time resolved fluorescence decay profile of 40.0  $\mu\text{M}$  Piperine (Black) and its complex with CT-DNA at D/N ratio = 1.0 (Red) and D/N ratio = 2.0 (Green).

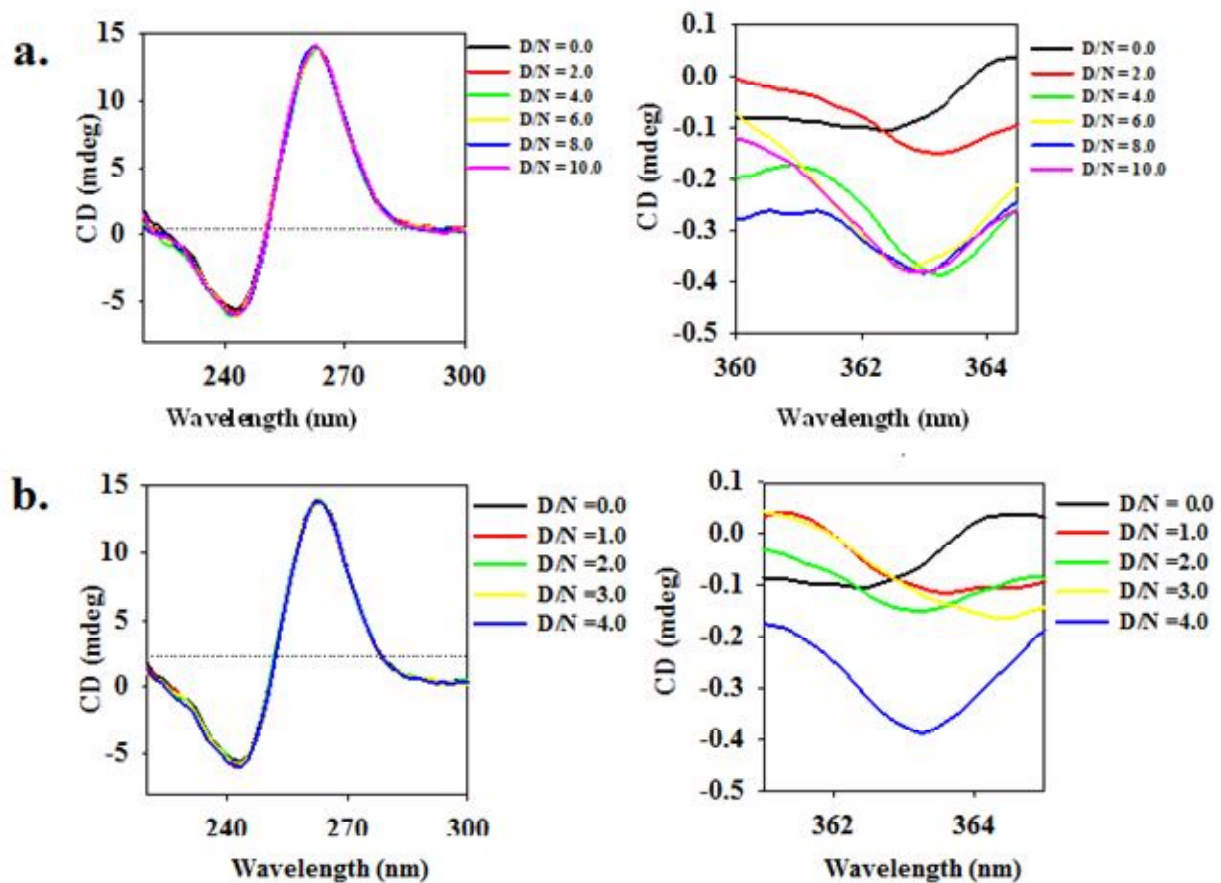

**Figure S2.** Circular Dichroism titration spectrum for free Pu24T (Black) and in the presence of Piperine as a function of increasing concentration of Piperine upto a. D/N ratio = 4.0, b. D/N ratio = 10.0. D= Piperine; N= Nucleic acid. Right hand images showing magnified ICD signals.

T<sup>1</sup>GAG<sup>4</sup>GG<sup>6</sup>TG<sup>8</sup>G<sup>9</sup>TGAG<sup>13</sup>GG<sup>15</sup>TG<sup>17</sup>GG<sup>19</sup>GAAGG<sup>24</sup>

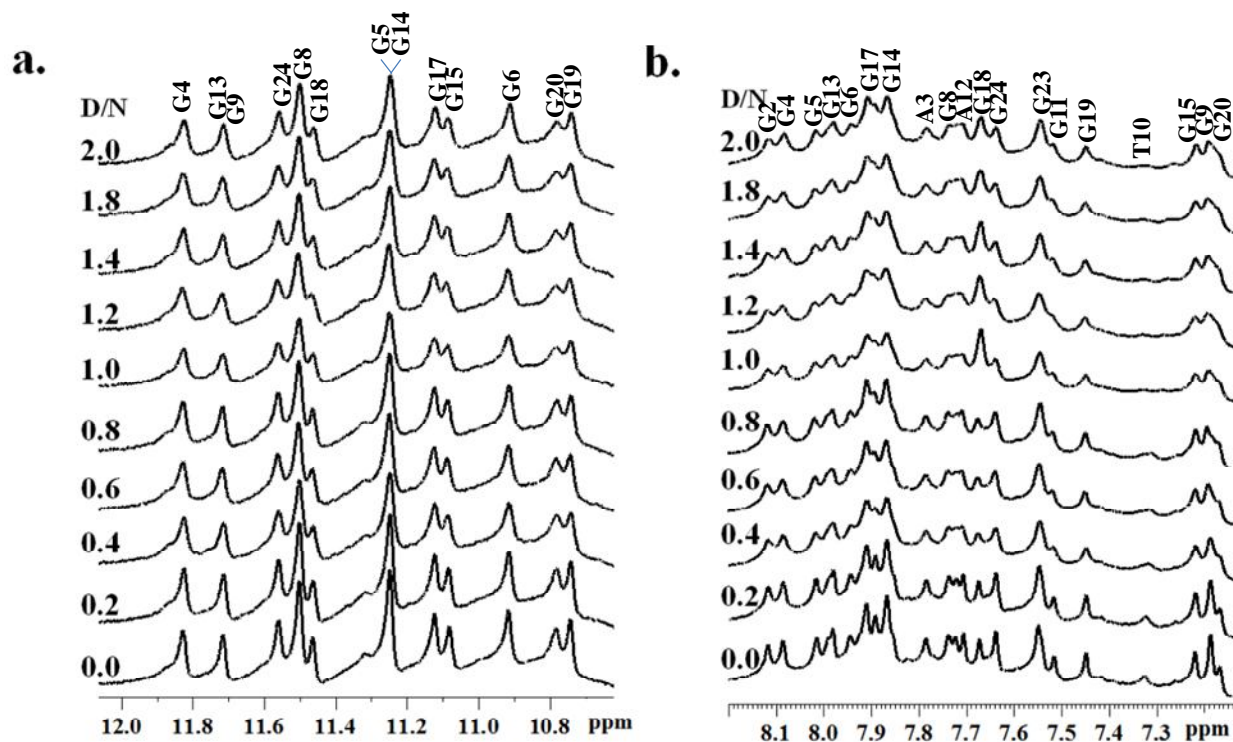

**Figure S3. One dimensional proton spectra for Piperine and Pu24T complex. a.** Imino region as a function of ligand/DNA (D/N) ratio at 298 K **b.** Base region as a function of ligand/DNA (D/N) ratio at 298 K.

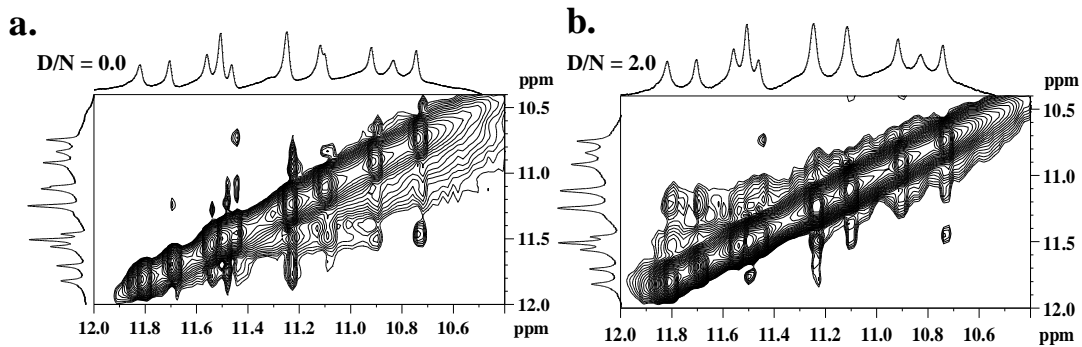

**Figure S4a.** Expansion of NOESY spectra showing imino region for Piperine and Pu24T-*c-myc* DNA as a function of ligand/DNA ratio A. D/N = 0.0 B. D/N = 2.0 at 298 K.

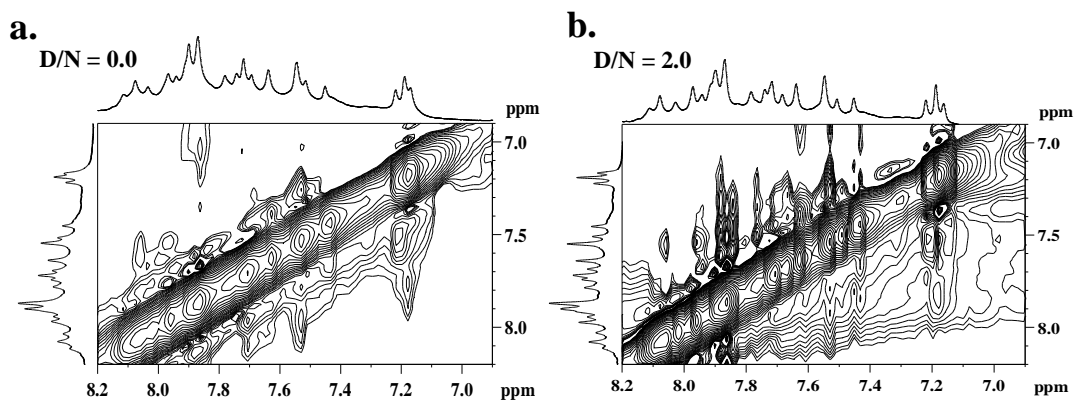

**Figure S4b.** Expansion of NOESY spectra showing base region for Piperine and Pu24T-*c-myc* DNA as a function of ligand/DNA ratio A. D/N = 0.0 B. D/N = 2.0 at 298 K.

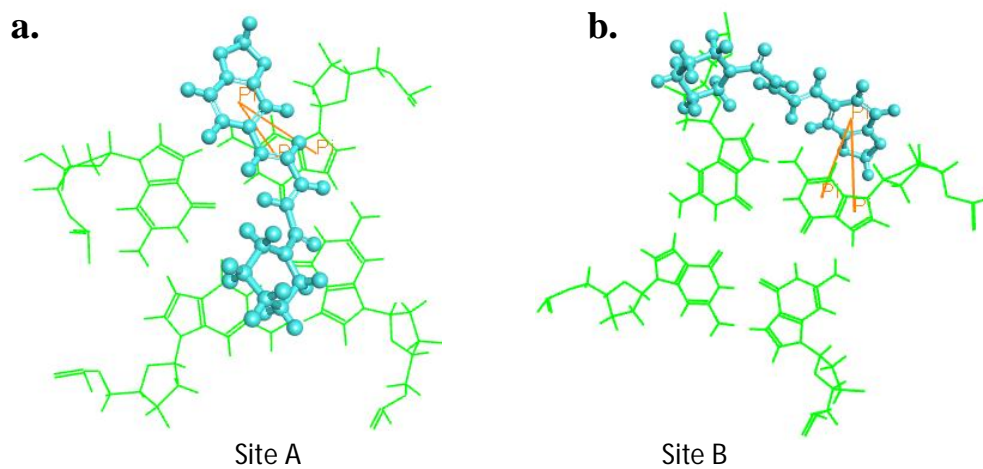

**Figure S5. Representation of docked structure of complex** obtained from docking by Autodock 4.0 showing  $\pi$ - $\pi$  interactions (orange colored line) between Piperine (cyan) and G-tetrads (green) of Pu24T for both the sites.



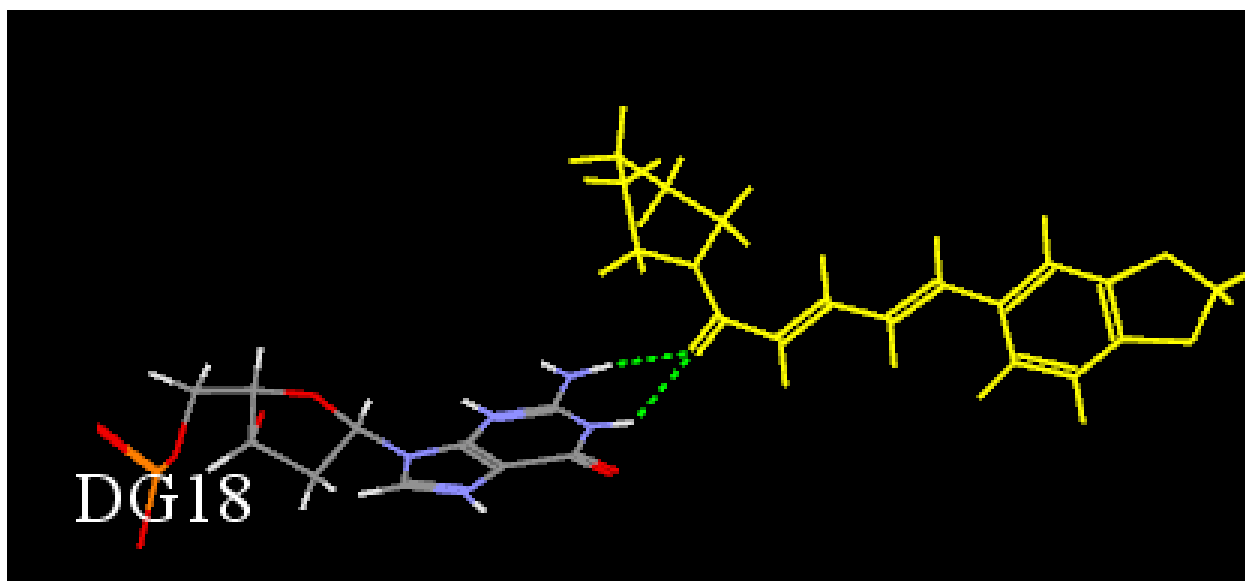

**Figure S6. Representation of hydrogen bond (green) formation** between G18 nucleotide and Piperine molecule (Yellow) as obtained from molecular dynamic simulation studies.

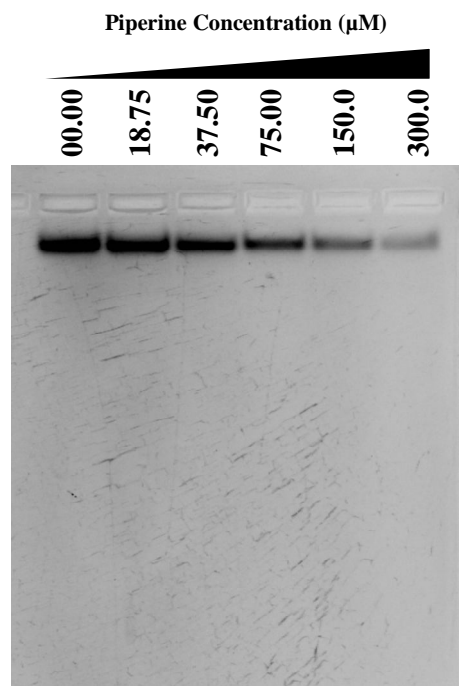

**Figure S7. PCR stop assay with Pu24T:** *Taq* Polymerase stop assay has been employed by following a modified protocol of previous study using a test oligonucleotide Pu24T : d-(5'-TGAGGGTGGTGAGGGTGGGGAAGG-3') and a complementary oligonucleotide (RevPu24T): d-(5'-TTCTCGTCCTTCCCCA-3'). The observed decrease in the intensity of the PCR product with increasing concentration of Piperine indicates that binding of Piperine stabilizes the G-quadruplex structure formed by Pu24T DNA and blocks *Taq* polymerase activity. Amplified products were resolved on a 3% agarose gel in 1X TBE and stained with EtBr. Gel Image was analyzed on ImageQuant LAS 4000 (GE Healthcare).

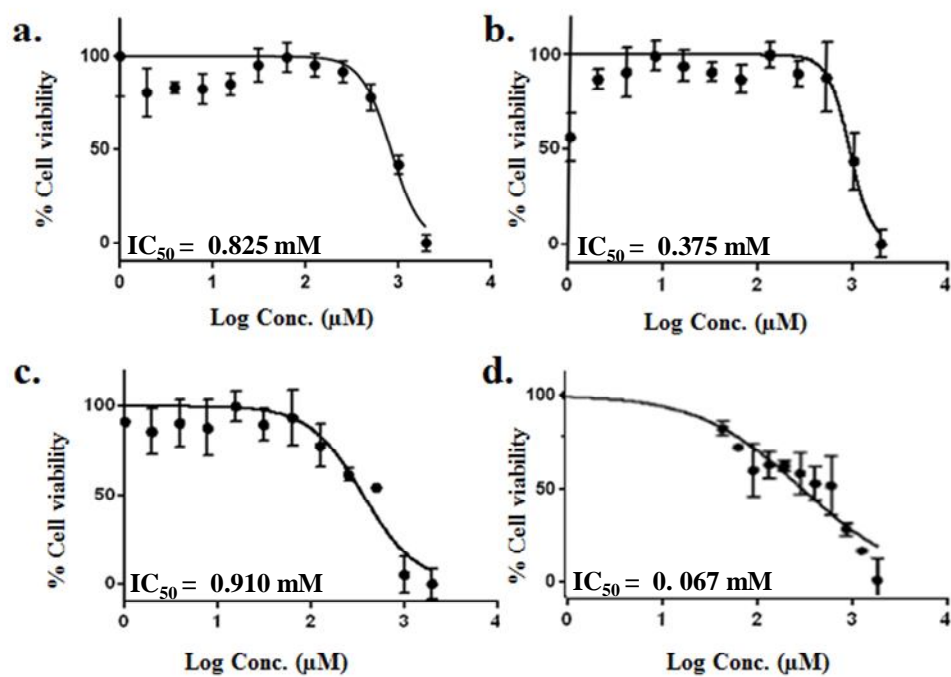

**Figure S8.** Cytotoxic effect of Piperine various cancer cell lines **a.** MCF-7 **b.** HepG2 **c.** HeLa **d.** PC3.  $\text{IC}_{50}$  values are mentioned at the bottom of plot.

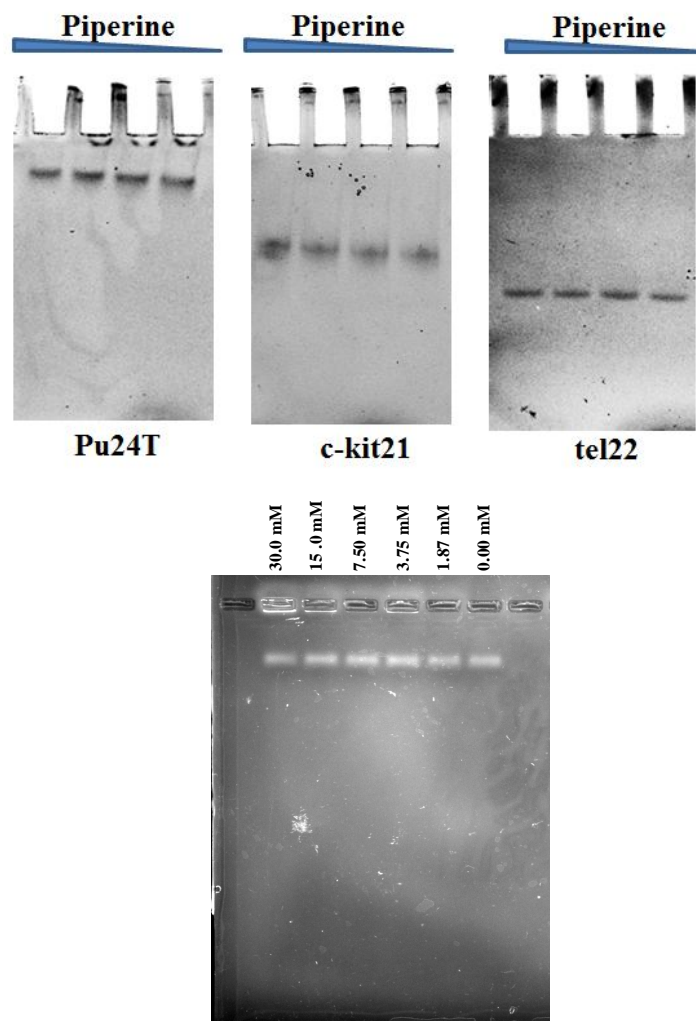

**Figure S9. Full image of Gel mobility shift assay :** Upper image : Native PAGE image for Increasing concentrations of Piperine incubated with various G-quadruplex DNA. Bottom image: Agarose gel image for increasing concentrations of Piperine (0, 1.88, 3.75, 7.50, 15.0 and 30.0 mM) was incubated with Pu24T DNA.

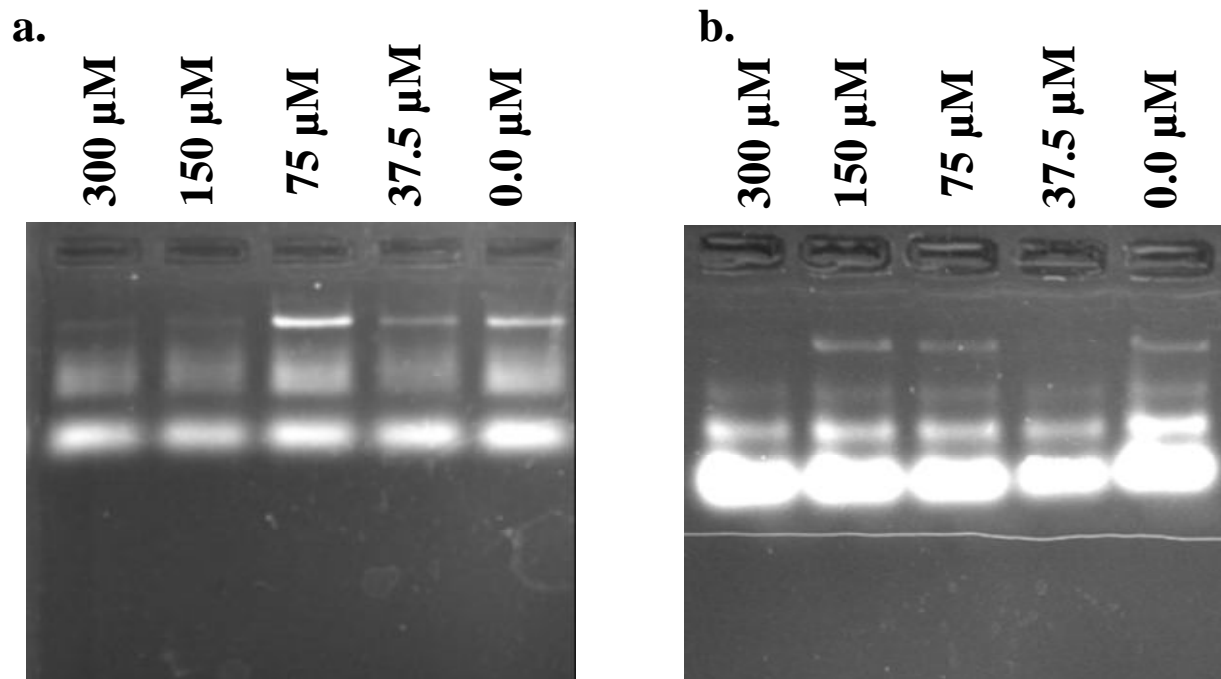

**Figure S10. Full image of semi-quantitative RT-PCR analysis: a. c-myc b.  $\beta$ -actin as function of Piperine concentration.**

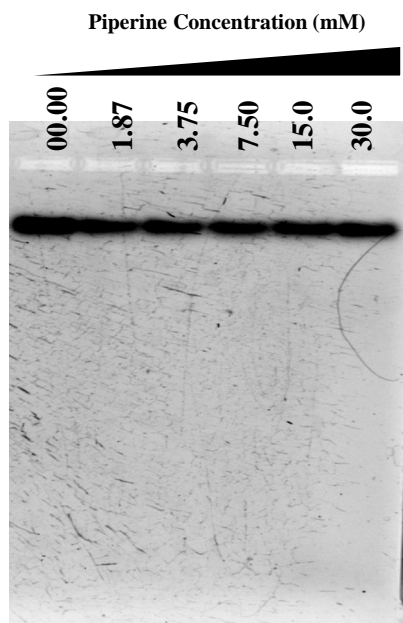

**Figure S11. Gel mobility shift assay :** Gel retardation assay for complimentary sequence of Pu24T that does not forms G-quadruplex structure with increasing concentration of Piperine. No significant shift in the mobility of DNA bands was observed.
